# Supplementary material for: Experimental and ab initio studies of two UV nonlinear optical materials
Source: Royal Society of Chemistry journal article supplement (doi:10.1039/c7ra02027a), 2017-01-01
Supplement: c7ra02027a1.pdf [file c7ra02027a1.pdf]

Supporting Information

## **Experimental and ab Initio Studies of Two UV Nonlinear Optical Materials**

Juanjuan Lu,<sup>†,‡</sup> Guoqiang Shi,<sup>†,‡</sup> Hongping Wu,<sup>\*,†</sup> Ming Wen,<sup>ε</sup> Dianwei Hou,<sup>†</sup>  
Zhihua Yang,<sup>†</sup> Fangfang Zhang,<sup>\*,†</sup> Shilie Pan<sup>\*,†</sup>

<sup>†</sup>JJ and GQ contributed equally

<sup>†</sup>*Key Laboratory of Functional Materials and Devices for Special Environments of CAS; Xinjiang  
Key Laboratory of Electronic Information Materials and Devices; Xinjiang Technical Institute of  
Physics & Chemistry of CAS, 40-1 South Beijing Road, Urumqi 830011, China*

<sup>‡</sup>*University of Chinese Academy of Sciences, Beijing 100049, China*

<sup>ε</sup>*School of Chemistry and Chemical Engineering, Harbin Institute of Technology, Harbin  
Heilongjiang 150001, China.*

\*To whom correspondence should be addressed. Phone: (+86)991-3674558.

Fax: (+86)991-3838957. E-mail: slpan@ms.xjb.ac.cn (S. Pan).

**Table S1.** Atomic coordinates ( $\times 10^4$ ), equivalent isotropic displacement coefficients ( $\text{\AA}^2 \times 10^3$ ) and BVS for compounds **I**, **II** and **III**.

| Compound I                            |          |           |           |                                |                      |
|---------------------------------------|----------|-----------|-----------|--------------------------------|----------------------|
| Atom                                  | X        | y         | z         | $U_{(\text{eq})}^{[\text{a}]}$ | BVS <sup>[b,c]</sup> |
| Ba(1)                                 | 3994(3)  | 1248(2)   | 5301(2)   | 15(1)                          | 2.40                 |
| Ba(2)                                 | 3360(20) | 922(15)   | 5386(12)  | 15(1)                          | 2.13                 |
| B(1)                                  | 3058(14) | 4335(15)  | 6193(16)  | 12(3)                          | 2.77                 |
| B(2)                                  | 3965(15) | 4303(13)  | 3529(15)  | 9(2)                           | 3.11                 |
| B(3)                                  | 5019(15) | 2092(15)  | 8924(16)  | 12(3)                          | 2.99                 |
| B(4)                                  | 0        | 0         | 3430(60)  | 59(12)                         | 3.20                 |
| O(1)                                  | 3932(8)  | 3992(8)   | 5216(8)   | 6(2)                           | 2.23                 |
| O(2)                                  | 2713(9)  | -1941(9)  | 5577(9)   | 10(2)                          | 2.17                 |
| O(3)                                  | 4066(9)  | 2503(9)   | 8042(9)   | 10(2)                          | 2.27                 |
| O(4)                                  | 4162(8)  | -698(8)   | 3278(8)   | 8(2)                           | 2.03                 |
| O(5)                                  | 4298(8)  | 3213(8)   | 2766(8)   | 7(2)                           | 2.09                 |
| O(6)                                  | 6667     | 3333      | 8723(15)  | 6(3)                           | 1.92                 |
| O(7)                                  | 1240(11) | -136(11)  | 3464(17)  | 51(4)                          | 2.21                 |
| O(8)                                  | 6667     | 3333      | 5190(20)  | 29(4)                          | 2.49                 |
| Compound II                           |          |           |           |                                |                      |
| Atom                                  | X        | y         | z         | $U_{(\text{eq})}$              | BVS                  |
| Ba <sub>0.72</sub> Pb <sub>0.28</sub> | 5956(1)  | 7250(1)   | 7350(2)   | 23(1)                          | 1.90                 |
| B(1)                                  | 8702(18) | 5686(19)  | 8260(20)  | 17(4)                          | 2.95                 |
| B(2)                                  | 4965(18) | 7064(17)  | 10930(20) | 18(3)                          | 2.99                 |
| B(3)                                  | 3940(20) | 4260(20)  | 10580(20) | 26(4)                          | 3.05                 |
| B(4)                                  | 10000    | 10000     | 5540(50)  | 32(8)                          | 3.02                 |
| O(1)                                  | 3333     | 6667      | 7160(30)  | 25(5)                          | 2.17                 |
| O(2)                                  | 8721(14) | 8612(15)  | 5450(20)  | 49(4)                          | 2.13                 |
| O(3)                                  | 6123(11) | 10061(12) | 7242(12)  | 21(3)                          | 2.05                 |
| O(4)                                  | 5941(12) | 8426(11)  | 10054(13) | 19(3)                          | 1.98                 |

| O(5)                | 7323(12) | 5337(12)  | 7610(12)  | 21(3)                     | 1.88                 |
|---------------------|----------|-----------|-----------|---------------------------|----------------------|
| O(6)                | 3333     | 6667      | 10730(18) | 10(3)                     | 2.03                 |
| O(7)                | 5147(11) | 5834(11)  | 10283(12) | 14(2)                     | 2.04                 |
| O(8)                | 8895(12) | 5709(12)  | 9791(12)  | 16(2)                     | 2.09                 |
| Compound <b>III</b> |          |           |           |                           |                      |
| Atom                | X        | y         | z         | $U_{(eq)}$ <sup>[a]</sup> | BVS <sup>[b,c]</sup> |
| Pb(1)               | 8652(1)  | 2729(1)   | 7855(1)   | 16(1)                     | 1.95                 |
| B(1)                | 5772(10) | -287(10)  | 6004(10)  | 8(2)                      | 3.07                 |
| B(2)                | 4966(10) | -2964(10) | 6354(10)  | 7(2)                      | 3.05                 |
| B(3)                | 5696(10) | -1297(10) | 8676(11)  | 9(2)                      | 2.96                 |
| B(4)                | 10000    | 10000     | 6060(30)  | 26(4)                     | 3.11                 |
| O(1)                | 5317(6)  | -2712(6)  | 8044(7)   | 6(1)                      | 1.82                 |
| O(2)                | 5964(6)  | -1570(6)  | 5484(6)   | 7(1)                      | 1.89                 |
| O(3)                | 3333     | -3333     | 6113(10)  | 6(2)                      | 2.07                 |
| O(4)                | 6103(6)  | -50(6)    | 7708(7)   | 12(1)                     | 2.00                 |
| O(5)                | 6859(6)  | 1139(6)   | 5257(7)   | 9(1)                      | 2.00                 |
| O(6)                | 5177(6)  | -4182(6)  | 5745(7)   | 8(1)                      | 1.93                 |
| O(7)                | 6667     | 3333      | 7424(12)  | 15(2)                     | 2.29                 |
| O(8)                | 8641(8)  | 8666(8)   | 6078(10)  | 37(2)                     | 2.09                 |

[a]  $U_{(eq)}$  is defined as the one-third of the trace of the orthogonalized  $U_{ij}$  tensor;

[b] Bond valences calculated with the program Bond Valence Calculator Version 2.00, C. Hormillosa, S. Healy, T. Stephen, McMaster University, 1993;

[c] Valence sums calculated with the formula:  $S_i = \exp[(R_0 - R_i)/B]$ , where  $S_i$  = valence of bond “i” and  $B = 0.37$ .

**Table S2a.** Selected bond lengths (Å) and angles (deg) for compound **I**.

---

|              |           |                     |          |
|--------------|-----------|---------------------|----------|
| Ba(1)-O(3)   | 2.675(8)  | O(3)-Ba(1)-O(1)#2   | 112.4(2) |
| Ba(1)-O(4)   | 2.719(8)  | O(4)-Ba(1)-O(1)#2   | 48.7(2)  |
| Ba(1)-O(1)   | 2.846(7)  | O(1)-Ba(1)-O(1)#2   | 144.0(2) |
| Ba(1)-O(2)   | 2.860(8)  | O(2)-Ba(1)-O(1)#2   | 60.8(2)  |
| Ba(1)-O(4)#1 | 2.864(7)  | O(4)#1-Ba(1)-O(1)#2 | 65.1(2)  |
| Ba(1)-O(5)   | 2.882(7)  | O(5)-Ba(1)-O(1)#2   | 116.1(2) |
| Ba(1)-O(7)   | 2.913(12) | O(7)-Ba(1)-O(1)#2   | 119.3(2) |
| Ba(1)-O(1)#2 | 2.973(7)  | O(7)-Ba(2)-O(2)     | 83.1(5)  |
| Ba(2)-O(7)   | 2.507(18) | O(7)-Ba(2)-O(3)     | 137.6(7) |
| Ba(2)-O(2)   | 2.672(14) | O(2)-Ba(2)-O(3)     | 117.0(4) |
| Ba(2)-O(3)   | 2.687(13) | O(7)-Ba(2)-O(4)     | 76.5(4)  |
| Ba(2)-O(4)   | 2.847(14) | O(2)-Ba(2)-O(4)     | 51.9(3)  |
| Ba(2)-O(1)   | 2.902(14) | O(3)-Ba(2)-O(4)     | 145.7(6) |
| Ba(2)-O(4)#1 | 3.000(13) | O(7)-Ba(2)-O(1)     | 95.6(4)  |
| Ba(2)-O(8)   | 3.043(18) | O(2)-Ba(2)-O(1)     | 177.6(7) |
| Ba(2)-O(5)   | 3.047(14) | O(3)-Ba(2)-O(1)     | 62.7(3)  |
| Ba(2)-O(7)#1 | 3.192(19) | O(4)-Ba(2)-O(1)     | 129.8(5) |
| B(1)-O(5)#4  | 1.368(15) | O(7)-Ba(2)-O(4)#1   | 152.0(7) |
| B(1)-O(1)    | 1.397(14) | O(2)-Ba(2)-O(4)#1   | 73.7(3)  |
| B(1)-O(2)#5  | 1.441(15) | O(3)-Ba(2)-O(4)#1   | 49.0(3)  |
| B(2)-O(4)#6  | 1.442(14) | O(4)-Ba(2)-O(4)#1   | 100.2(5) |
| B(2)-O(3)#7  | 1.456(15) | O(1)-Ba(2)-O(4)#1   | 107.0(4) |
| B(2)-O(5)    | 1.476(14) | O(7)-Ba(2)-O(8)     | 133.4(6) |
| B(2)-O(1)    | 1.486(15) | O(2)-Ba(2)-O(8)     | 117.3(5) |
| B(3)-O(3)    | 1.457(15) | O(3)-Ba(2)-O(8)     | 72.8(5)  |
| B(3)-O(2)#1  | 1.462(16) | O(4)-Ba(2)-O(8)     | 84.7(5)  |
| B(3)-O(4)#1  | 1.465(15) | O(1)-Ba(2)-O(8)     | 65.0(3)  |
| B(3)-O(6)    | 1.534(13) | O(4)#1-Ba(2)-O(8)   | 72.7(5)  |

---

---

|                   |            |                     |           |
|-------------------|------------|---------------------|-----------|
| B(4)-O(7)#8       | 1.347(10)  | O(7)-Ba(2)-O(5)     | 73.5(4)   |
| B(4)-O(7)#5       | 1.347(10)  | O(2)-Ba(2)-O(5)     | 134.6(4)  |
| B(4)-O(7)         | 1.347(9)   | O(3)-Ba(2)-O(5)     | 106.3(5)  |
| O(8)-Ba(1)-O(3)   | 82.5(4)    | O(4)-Ba(2)-O(5)     | 84.5(4)   |
| O(8)-Ba(1)-O(4)   | 99.1(3)    | O(1)-Ba(2)-O(5)     | 46.5(3)   |
| O(3)-Ba(1)-O(4)   | 157.4(2)   | O(4)#1-Ba(2)-O(5)   | 134.3(6)  |
| O(8)-Ba(1)-O(1)   | 73.14(14)  | O(8)-Ba(2)-O(5)     | 62.4(4)   |
| O(3)-Ba(1)-O(1)   | 63.7(2)    | O(7)-Ba(2)-O(7)#1   | 97.8(6)   |
| O(4)-Ba(1)-O(1)   | 138.6(2)   | O(2)-Ba(2)-O(7)#1   | 84.0(4)   |
| O(8)-Ba(1)-O(2)   | 131.48(18) | O(3)-Ba(2)-O(7)#1   | 52.4(3)   |
| O(3)-Ba(1)-O(2)   | 111.3(2)   | O(4)-Ba(2)-O(7)#1   | 135.8(5)  |
| O(4)-Ba(1)-O(2)   | 51.4(2)    | O(1)-Ba(2)-O(7)#1   | 94.2(4)   |
| O(1)-Ba(1)-O(2)   | 155.2(2)   | O(4)#1-Ba(2)-O(7)#1 | 64.9(3)   |
| O(8)-Ba(1)-O(4)#1 | 83.6(4)    | O(5)-Ba(2)-O(7)#1   | 136.7(5)  |
| O(3)-Ba(1)-O(4)#1 | 50.6(2)    | O(5)#4-B(1)-O(1)    | 119.5(10) |
| O(4)-Ba(1)-O(4)#1 | 106.91(19) | O(5)#4-B(1)-O(2)#5  | 119.2(10) |
| O(1)-Ba(1)-O(4)#1 | 112.3(2)   | O(1)-B(1)-O(2)#5    | 121.2(11) |
| O(2)-Ba(1)-O(4)#1 | 73.2(2)    | O(4)#6-B(2)-O(3)#7  | 111.6(9)  |
| O(8)-Ba(1)-O(5)   | 71.5(4)    | O(4)#6-B(2)-O(5)    | 112.1(9)  |
| O(3)-Ba(1)-O(5)   | 111.5(2)   | O(3)#7-B(2)-O(5)    | 110.7(9)  |
| O(4)-Ba(1)-O(5)   | 90.1(2)    | O(4)#6-B(2)-O(1)    | 107.3(9)  |
| O(1)-Ba(1)-O(5)   | 48.5(2)    | O(3)#7-B(2)-O(1)    | 109.6(9)  |
| O(2)-Ba(1)-O(5)   | 133.6(2)   | O(5)-B(2)-O(1)      | 105.3(9)  |
| O(4)#1-Ba(1)-O(5) | 151.9(2)   | O(3)-B(3)-O(2)#1    | 111.5(9)  |
| O(8)-Ba(1)-O(7)   | 141.0(5)   | O(2)#1-B(3)-O(4)#1  | 111.7(10) |
| O(3)-Ba(1)-O(7)   | 120.1(3)   | O(3)-B(3)-O(6)      | 108.7(10) |
| O(4)-Ba(1)-O(7)   | 72.3(3)    | O(2)#1-B(3)-O(6)    | 108.4(10) |
| O(2)-Ba(1)-O(7)   | 73.1(3)    | O(4)#1-B(3)-O(6)    | 107.8(9)  |
| O(4)#1-Ba(1)-O(7) | 135.4(3)   | O(7)#8-B(4)-O(7)#5  | 119.9(2)  |

---

---

|                   |           |                  |          |
|-------------------|-----------|------------------|----------|
| O(5)-Ba(1)-O(7)   | 70.6(3)   | O(7)#8-B(4)-O(7) | 119.9(2) |
| O(8)-Ba(1)-O(1)#2 | 70.90(16) | O(7)#5-B(4)-O(7) | 119.9(2) |

---

Symmetry transformations used to generate equivalent atoms:

#1  $x-y, -y, z+1/2$     #2  $-y+1, x-y, z$     #3  $x-y, -y, z-1/2$   
#4  $y, x, z+1/2$     #5  $-y, x-y, z$     #6  $-x+y+1, -x+1, z$   
#7  $y, x, z-1/2$     #8  $-x+y, -x, z$

**Table S2b.** Selected bond lengths (Å) and angles (deg) for compound **II**.

---

|                   |           |                     |           |
|-------------------|-----------|---------------------|-----------|
| Ba/Pb-O(1)        | 2.442(3)  | O(7)-Ba/Pb-O(8)#1   | 154.4(3)  |
| Ba/Pb-O(4)        | 2.619(11) | O(1)-Ba/Pb-O(5)     | 132.4(2)  |
| Ba/Pb-O(7)#1      | 2.741(10) | O(4)-Ba/Pb-O(5)     | 110.7(3)  |
| Ba/Pb-O(3)        | 2.793(12) | O(7)#1-Ba/Pb-O(5)   | 51.3(3)   |
| Ba/Pb-O(7)        | 2.815(11) | O(3)-Ba/Pb-O(5)     | 152.4(3)  |
| Ba/Pb-O(8)#1      | 2.853(11) | O(7)-Ba/Pb-O(5)     | 72.8(3)   |
| Ba/Pb-O(5)        | 2.924(12) | O(8)#1-Ba/Pb-O(5)   | 131.7(3)  |
| Ba/Pb-O(2)        | 2.939(14) | O(1)-Ba/Pb-O(2)     | 139.1(6)  |
| Ba/Pb-O(3)#2      | 3.005(10) | O(4)-Ba/Pb-O(2)     | 119.9(4)  |
| Ba/Pb-B(2)        | 3.211(18) | O(7)#1-Ba/Pb-O(2)   | 70.7(4)   |
| Ba/Pb-B(3)#1      | 3.296(19) | O(3)-Ba/Pb-O(2)     | 86.8(4)   |
| Ba/Pb-B(2)#1      | 3.296(18) | O(7)-Ba/Pb-O(2)     | 134.8(4)  |
| B(1)-O(8)         | 1.33(2)   | O(8)#1-Ba/Pb-O(2)   | 69.0(4)   |
| B(1)-O(5)         | 1.39(2)   | O(5)-Ba/Pb-O(2)     | 72.0(4)   |
| B(1)-O(3)#3       | 1.423(19) | O(1)-Ba/Pb-O(3)#2   | 71.2(2)   |
| B(2)-O(4)         | 1.45(2)   | O(4)-Ba/Pb-O(3)#2   | 113.3(3)  |
| B(2)-O(7)         | 1.467(18) | O(7)#1-Ba/Pb-O(3)#2 | 49.1(3)   |
| B(2)-O(5)#4       | 1.48(2)   | O(3)-Ba/Pb-O(3)#2   | 146.4(3)  |
| B(2)-O(6)         | 1.515(17) | O(7)-Ba/Pb-O(3)#2   | 65.3(3)   |
| B(3)-O(3)#5       | 1.46(2)   | O(8)#1-Ba/Pb-O(3)#2 | 116.1(3)  |
| B(3)-O(4)#2       | 1.47(2)   | O(5)-Ba/Pb-O(3)#2   | 61.3(3)   |
| B(3)-O(7)         | 1.48(2)   | O(2)-Ba/Pb-O(3)#2   | 118.2(3)  |
| B(3)-O(8)#6       | 1.48(2)   | O(8)-B(1)-O(5)      | 121.8(14) |
| B(4)-O(2)         | 1.368(12) | O(8)-B(1)-O(3)#3    | 120.0(14) |
| B(4)-O(2)#3       | 1.368(12) | O(5)-B(1)-O(3)#3    | 118.2(15) |
| B(4)-O(2)#7       | 1.368(12) | O(4)-B(2)-O(7)      | 107.8(12) |
| O(1)-Ba/Pb-O(4)   | 85.1(5)   | O(4)-B(2)-O(5)#4    | 109.9(12) |
| O(1)-Ba/Pb-O(7)#1 | 98.7(4)   | O(7)-B(2)-O(5)#4    | 112.9(13) |

---

---

|                     |          |                    |           |
|---------------------|----------|--------------------|-----------|
| O(4)-Ba/Pb-O(7)#1   | 157.8(3) | O(4)-B(2)-O(6)     | 109.6(12) |
| O(1)-Ba/Pb-O(3)     | 75.2(2)  | O(7)-B(2)-O(6)     | 108.8(11) |
| O(4)-Ba/Pb-O(3)     | 64.4(3)  | O(5)#4-B(2)-O(6)   | 107.9(13) |
| O(7)#1-Ba/Pb-O(3)   | 137.8(3) | O(3)#5-B(3)-O(7)   | 109.6(13) |
| O(1)-Ba/Pb-O(7)     | 86.0(5)  | O(4)#2-B(3)-O(7)   | 109.4(14) |
| O(4)-Ba/Pb-O(7)     | 51.3(3)  | O(3)#5-B(3)-O(8)#6 | 106.5(14) |
| O(7)#1-Ba/Pb-O(7)   | 106.9(3) | O(4)#2-B(3)-O(8)#6 | 111.0(13) |
| O(3)-Ba/Pb-O(7)     | 114.2(3) | O(7)-B(3)-O(8)#6   | 110.5(14) |
| O(1)-Ba/Pb-O(8)#1   | 71.5(5)  | O(2)-B(4)-O(2)#3   | 119.7(4)  |
| O(4)-Ba/Pb-O(8)#1   | 112.9(3) | O(2)-B(4)-O(2)#7   | 119.7(4)  |
| O(7)#1-Ba/Pb-O(8)#1 | 88.9(3)  | O(2)#3-B(4)-O(2)#7 | 119.7(4)  |
| O(3)-Ba/Pb-O(8)#1   | 49.2(3)  |                    |           |

---

Symmetry transformations used to generate equivalent atoms:

#1  $y, x, z-1/2$     #2  $-x+y, -x+1, z$     #3  $-y+2, x-y+1, z$   
#4  $y, x, z+1/2$     #5  $-x+1, -x+y, z+1/2$     #6  $-y+1, x-y, z$   
#7  $-x+y+1, -x+2, z$     #8  $-y+1, x-y+1, z$   
#9  $-x+1, -x+y+1, z-1/2$     #10  $-x+y+1, -x+1, z$



**Table S2c.** Selected bond lengths (Å) and angles (deg) for Compound **III**.

|                   |            |                     |            |
|-------------------|------------|---------------------|------------|
| Pb(1)-O(7)        | 2.3934(17) | O(7)-Pb(1)-O(6)#2   | 94.9(2)    |
| Pb(1)-O(2)#1      | 2.520(6)   | O(2)#1-Pb(1)-O(6)#2 | 158.25(17) |
| Pb(1)-O(4)        | 2.696(5)   | O(4)-Pb(1)-O(6)#2   | 136.17(17) |
| Pb(1)-O(6)#2      | 2.736(6)   | O(5)-B(1)-O(2)      | 111.9(6)   |
| B(1)-O(5)         | 1.449(10)  | O(5)-B(1)-O(6)#3    | 111.5(6)   |
| B(1)-O(2)         | 1.469(10)  | O(2)-B(1)-O(6)#3    | 110.3(6)   |
| B(1)-O(6)#3       | 1.474(10)  | O(5)-B(1)-O(4)      | 105.9(6)   |
| B(1)-O(4)         | 1.484(10)  | O(2)-B(1)-O(4)      | 108.7(6)   |
| B(2)-O(6)         | 1.443(9)   | O(6)#3-B(1)-O(4)    | 108.4(6)   |
| B(2)-O(2)         | 1.458(10)  | O(6)-B(2)-O(2)      | 108.2(6)   |
| B(2)-O(1)         | 1.477(10)  | O(6)-B(2)-O(1)      | 112.0(6)   |
| B(2)-O(3)         | 1.509(9)   | O(2)-B(2)-O(1)      | 109.9(6)   |
| B(3)-O(5)#1       | 1.357(10)  | O(6)-B(2)-O(3)      | 110.3(6)   |
| B(3)-O(4)         | 1.384(10)  | O(2)-B(2)-O(3)      | 108.1(6)   |
| B(3)-O(1)         | 1.388(10)  | O(1)-B(2)-O(3)      | 108.2(7)   |
| B(4)-O(8)#4       | 1.358(7)   | O(5)#1-B(3)-O(4)    | 120.5(7)   |
| B(4)-O(8)         | 1.358(7)   | O(5)#1-B(3)-O(1)    | 119.1(7)   |
| B(4)-O(8)#5       | 1.358(7)   | O(4)-B(3)-O(1)      | 120.4(7)   |
| O(7)-Pb(1)-O(2)#1 | 91.0(3)    | O(8)#4-B(4)-O(8)    | 119.99(5)  |
| O(7)-Pb(1)-O(4)   | 76.91(12)  | O(8)#4-B(4)-O(8)#5  | 119.99(5)  |
| O(2)#1-Pb(1)-O(4) | 65.58(17)  | O(8)-B(4)-O(8)#5    | 119.99(5)  |

Symmetry transformations used to generate equivalent atoms:

#1  $x-y, -y, z+1/2$  #2  $-x+y+2, -x+1, z$

#3  $-y, x-y-1, z$  #4  $-x+y+1, -x+2, z$  #5  $-y+2, x-y+1, z$

#6  $x-y, -y, z-1/2$  #7  $-x+y+1, -x, z$  #8  $-y+1, x-y-1, z$

#9  $-x+y+1, -x+1, z$  #10  $-y+1, x-y, z$

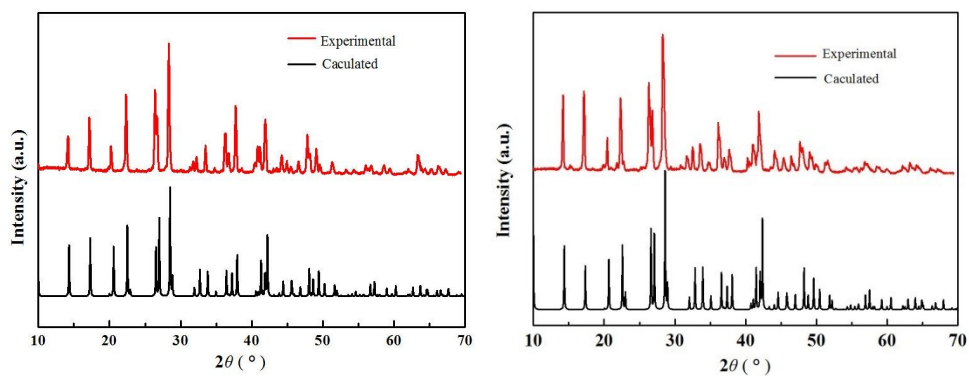

(a)

(b)

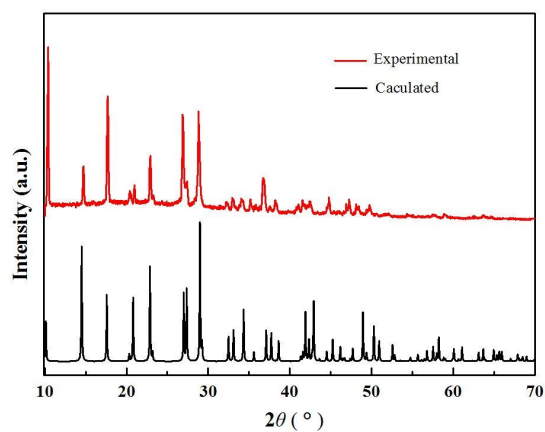

(c)

**Figure S1.** Experimental and calculated XRD patterns of compounds **I** (a), **II** (b) and **III** (c).

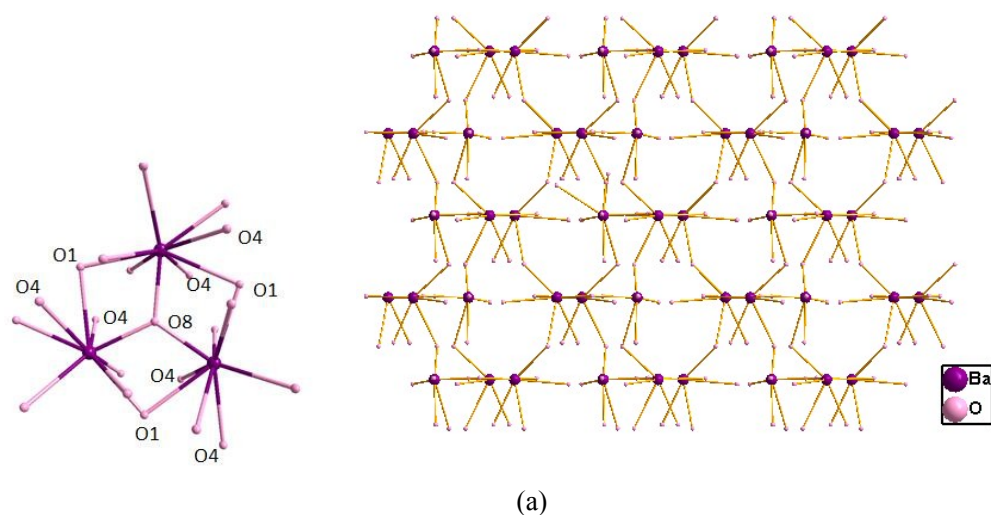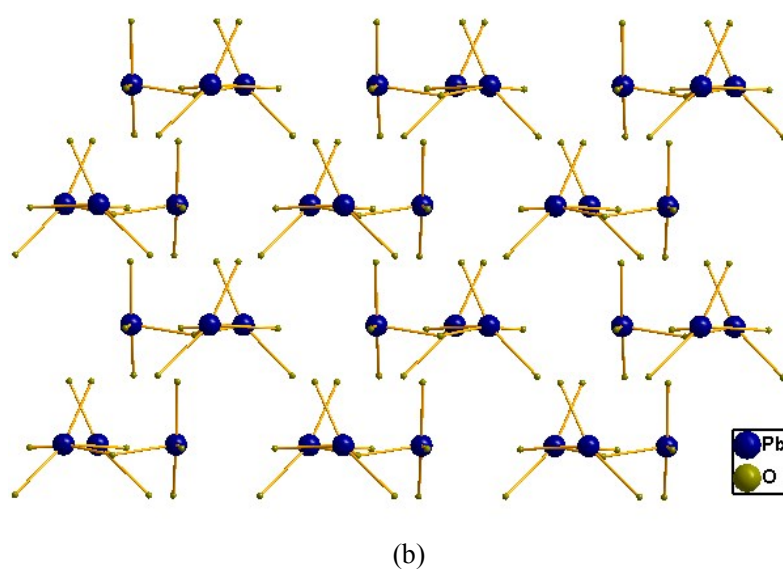

**Figure S2.** (a) The Ba/PbO<sub>9</sub> polyhedra connect with each other by sharing edge to form the Ba-O framework. (b) Three PbO<sub>4</sub> tetrahedra are linked by sharing O7 atoms to form the isolated Pb<sub>3</sub>O<sub>10</sub> trimer.

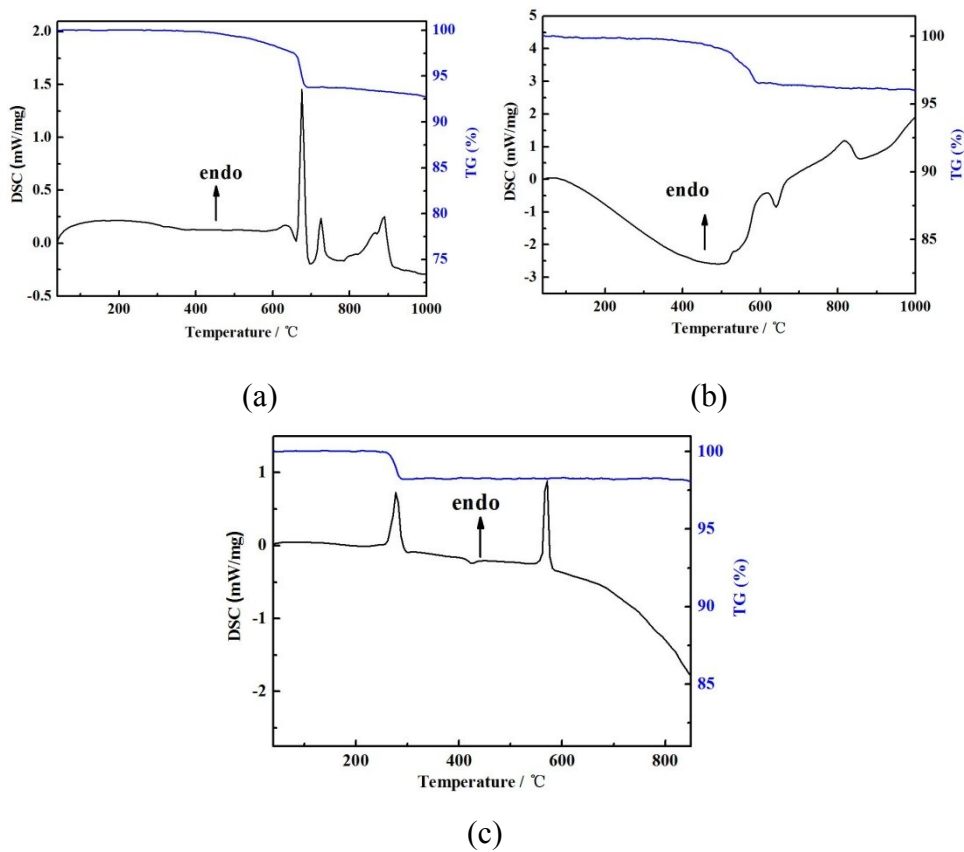

**Figure S3.** TG-DSC curves for compounds **I** (a), **II** (b) and **III** (c).

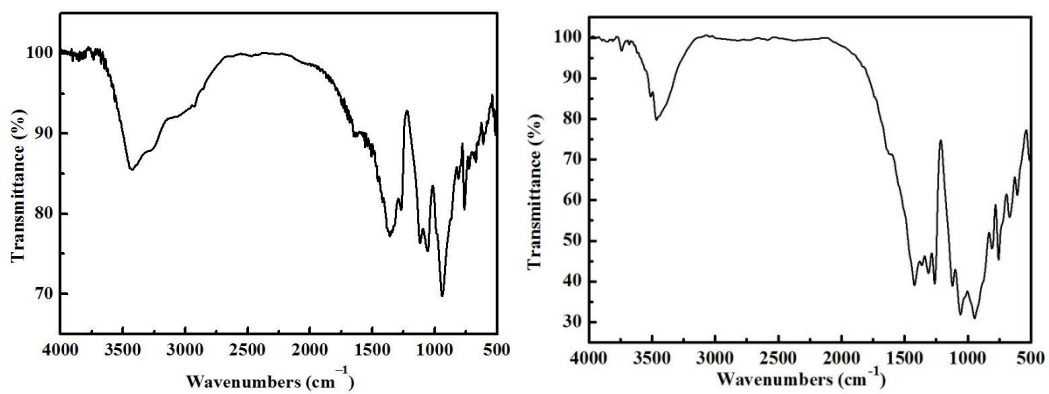

(a)

(b)

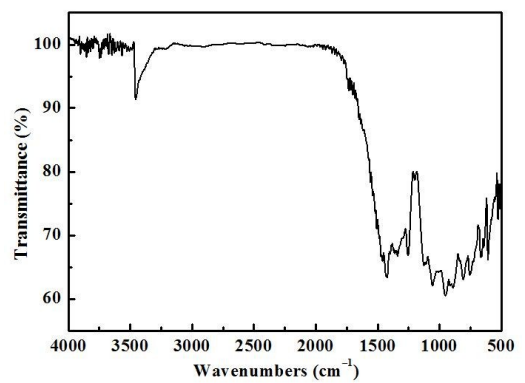

(c)

**Figure S4.** IR spectra for compounds **I** (a), **II** (b) and **III** (c).

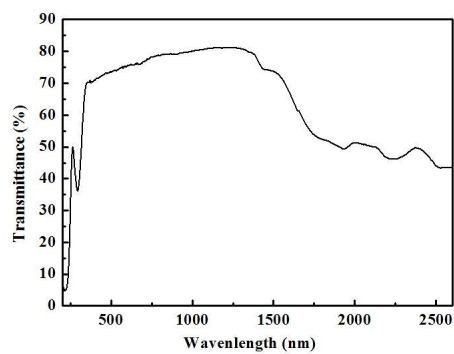

(a)

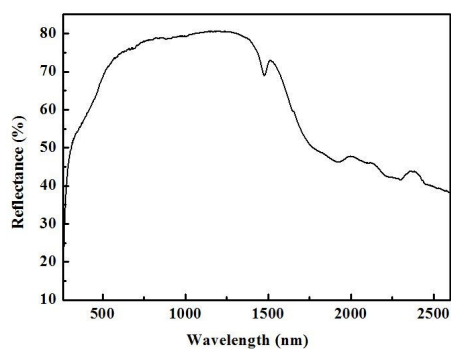

(b)

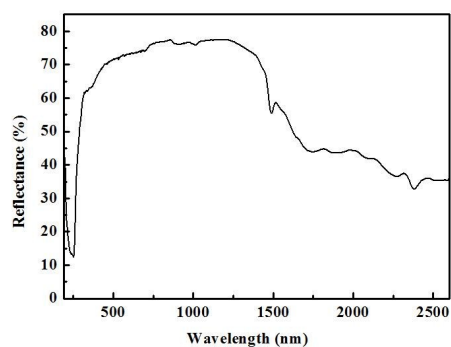

(c)

**Figure S5.** UV–VIS–NIR diffuse reflectance spectra for compounds **I** (a), **II** (b) and **III** (c).
